# Supplementary material
Source: PubMed Central journal article supplement (PMC7934142)
Supplement: sj-pdf-1-ebm-10.1177_1535370220967325.pdf [file sj-pdf-1-ebm-10.1177_1535370220967325.pdf]

Supplementary table 1. PRC patient characteristics.

|            | Subj. no | Gender | Age (yr) | Disease onset age (yr) | Duration of disease (years) | Relatives with PD <sup>v</sup> | Leading symptom* | HY  | SE-ADL | MMSE | MDS-UPDRS |
|------------|----------|--------|----------|------------------------|-----------------------------|--------------------------------|------------------|-----|--------|------|-----------|
| qRT-PCR PD |          |        |          |                        |                             |                                |                  |     |        |      |           |
|            | 1        | M      | 68       | 65                     | 2,5                         | 3                              | 3                | 2,5 | 70     | 29   | 66        |
|            | 2        | F      | 65       | 55                     | 10                          | 1                              | 4                | 4   | 60     | 30   | 114       |
|            | 3        | M      | 73       | 65                     | 9                           | 1                              | 3                | 3   | 80     | 30   | 77        |
|            | 4        | M      | 65       | 57                     | 9                           | 1                              | 1                | 1,5 | 90     | 30   | 52        |
|            | 5        | F      | 80       | 63                     | 17                          | 2                              | 1                | 3   | 70     | 28   | 92        |
|            | 6        | M      | 77       | 71                     | 6                           | 1                              | 1                | 2   | 95     | 24   | 42        |
|            | 7        | M      | 68       | 53                     | 15                          | 1                              | 3                | 2   | 90     | 30   | 49        |
|            | 8        | M      | 60       | 46                     | 14                          | 3                              | 3                | 2,5 | 80     | 28   | 83        |
|            | 9        | M      | 71       | 70                     | 0,9                         | 1                              | 1                | 1,5 | 90     | 29   | 33        |
|            | 10       | F      | 66       | 64                     | 2                           | 1                              | 3                | 2   | 90     | 29   | 35        |
|            | 11       | M      | 54       | 46                     | 8                           | 1                              | 3                | 2   | 90     | 30   | 51        |
|            | 12       | F      | 69       | 65                     | 4                           | 1                              | 1                | 1,5 | 90     | 30   | 59        |
|            | 13       | M      | 72       | 63                     | 9                           | 1                              | 3                | 3   | 90     | 30   | 53        |
|            | 14       | M      | 77       | 67                     | 10                          | 1                              | 1                | 4   | 60     | 27   | 104       |
|            | 15       | M      | 70       | 68                     | 2                           | 1                              | 1                | 1,5 | 90     | 29   | 43        |
|            | 16       | M      | 60       | 52                     | 8                           | 1                              | 2                | 2,5 | 90     | 30   | 37        |
|            | 17       | F      | 68       | 61                     | 7,4                         | 1                              | 3                | 1,5 | 90     | 30   | 33        |
|            | 18       | M      | 58       | 46                     | 12                          | 3                              | 2                | 3   | 80     | 29   | 102       |

|     |    |         |    |     |                                  |                             |     |     |    |     |
|-----|----|---------|----|-----|----------------------------------|-----------------------------|-----|-----|----|-----|
| 19  | F  | 57      | 53 | 4   | 1                                | 1                           | 1,5 | 90  | 30 | 51  |
| 20  | F  | 76      | 67 | 9   | 1                                | 1                           | 3   | 80  | 30 | 85  |
| 21  | F  | 71      | 60 | 11  | 2                                | 1                           | 2,5 | 80  | 30 | 58  |
| 22  | F  | 82      | 74 | 9,5 | 1                                | 4                           | 4   | 60  | 26 | 79  |
| 23  | F  | 58      | 47 | 13  | 1                                | 1                           | 2,5 | 90  | 26 | 71  |
| 24  | F  | 71      | 47 | 25  | 1                                | 4                           | 4   | 55  | 30 | 115 |
| 25  | F  | 66      | 60 | 7   | 1                                | 1                           | 2   | 90  | 30 | 43  |
| 26  | F  | 73      | 60 | 14  | 2                                | 3                           | 2,5 | 80  | 28 | 54  |
| 27  | F  | 77      | 68 | 9   | 1                                | 3                           | 3   | 70  | 30 | 68  |
| 28  | F  | 64      | 58 | 6   | 3                                | 2                           | 2,5 | 90  | 30 | 35  |
| 29  | M  | 74      | 63 | 11  | 1                                | 3                           | 3   | 70  | 25 | 55  |
| 30  | M  | 63      | 58 | 3,7 | 1                                | 1                           | 2,5 | 90  | 30 | 40  |
| 31  | M  | 83      | 72 | 10  | 1                                | 1                           | 2,5 | 80  | 28 | 68  |
| 32  | F  | 76      | 73 | 2,9 | 1                                | 1                           | 3   | 80  | 27 | 77  |
| 33  | M  | 67      | 64 | 2,8 | 1                                | 3                           | 2   | 90  | 29 | 65  |
| 34  | F  | 68      | 65 | 3   | 1                                | 1                           | 1,5 | 100 | 30 | 26  |
| 35  | M  | 75      | 64 | 12  | 1                                | 4                           | 4   | 70  | 30 | 105 |
| 36  | F  | 69      | 67 | 2   | 1                                | 1                           | 2,5 | 80  | 29 | 72  |
| 37  | F  | 80      | 76 | 4,3 | 1                                | 3                           | 2   | 95  | 25 | 28  |
| n/% | 37 | M=18/49 |    |     | 1=30/81,1<br>2=3/8,1<br>3=4/10,8 | 1=17/46<br>2=3/8<br>3=13/35 |     |     |    |     |

|              |    |         |          |          |         |   |        |         |           |          |           |
|--------------|----|---------|----------|----------|---------|---|--------|---------|-----------|----------|-----------|
|              |    |         |          |          |         |   | 4=4/11 |         |           |          |           |
| Mean<br>± SD |    |         | 69.5±7.3 | 61.4±8.3 | 8.2±5.1 |   |        | 2.5±0.8 | 82.0±11.3 | 28.8±1.7 | 62.7±24.8 |
| qRT-PCR HC   |    |         |          |          |         |   |        |         |           |          |           |
| n/%          | 33 | M=12/36 |          |          |         | - | -      |         |           |          |           |
| Mean<br>± SD |    |         | 72.1±7.9 | -        | -       |   |        | -       | -         | -        | -         |

PD – patients with Parkinson’s disease; HC – healthy controls

˘Familial incidence of PD: 1 - no relatives with PD, 2 - relatives with PD of 1<sup>st</sup> degree, 3 - relatives with PD of 2<sup>nd</sup> degree

\*Leading clinical symptom of PD: 1- Tremor; 2 - Rigidity; 3 - Bradykinesia; 4 – Postural instability.

Abbreviations: PD, Parkinson’s disease; HY, Hoehn and Yahr stage; SE-ADL, Schwab and England Activities of Daily Living Scale; MMSE, Mini Mental State Examination; MDS-UPDRS, Movement Disorders Society Unified Parkinson’s Disease Rating Scale.

Supplementary Table 2. Input list of previous studies for the RRA analysis

| RRA group | Dataset         | Platform          | Gene list cut-off default | Gene list cut-off applied        | DEG list type                                                                                 | N DEGs at applied cut-off | N DEGs automatically annotated (Entrez) | N DEGs missing Entrez annotation | N DEGs used for RRA |
|-----------|-----------------|-------------------|---------------------------|----------------------------------|-----------------------------------------------------------------------------------------------|---------------------------|-----------------------------------------|----------------------------------|---------------------|
| Blood     | Soreq_2008      | microarray        | $p \leq 0.05$             | $p \leq 0.05$ (cannot calc. FDR) | probe IDs (multiple probes can correspond to a single gene or single probe to multiple genes) | 982                       | 1022 (932 unique)                       | 50                               | 869                 |
|           | Santiago_2015   | microarray (meta) | $FDR \leq 0.05$           | $FDR \leq 0.05$                  | Entrez IDs                                                                                    | 2781                      | 2781                                    | 0                                | 2781                |
|           | Infante_2015    | RNAseq            | $FDR \leq 0.05$           | $FDR \leq 0.05$                  | Gene symbols                                                                                  | 296                       | 274                                     | 8                                | 285                 |
|           | Calligaris_2015 | microarray        | $FDR \leq 0.01$           | $FDR \leq 0.01$                  | probe IDs (multiple probes can correspond to a single gene or single probe to multiple genes) | 306                       | 313 (291 unique)                        | 14                               | 273                 |
|           | Kedmi_2011      | microarray        | $p \leq 0.01$             | $p \leq 0.01$                    | RefSeq IDs                                                                                    | 115                       | 108                                     | 0                                | 115                 |
|           | Kurvits_TBA     | RNAseq            | full list                 | $FDR \leq 0.1$                   | Gene symbols                                                                                  | 62                        | 50                                      | 3                                | 59                  |
| Cortex    | Stamper_2008    | microarray        | $p \leq 0.01$             | $p \leq 0.01$                    | probe IDs (multiple probes can correspond to a single gene or single probe to multiple genes) | 162                       | 150 (146 unique)                        | 16                               | 138                 |

|  |               |        |           |             |              |      |                    |    |      |
|--|---------------|--------|-----------|-------------|--------------|------|--------------------|----|------|
|  | Dimitriu_2016 | RNAseq | full list | FDR <= 0.05 | Gene symbols | 1095 | 1026 (1022 unique) | 73 | 1022 |
|--|---------------|--------|-----------|-------------|--------------|------|--------------------|----|------|

|    |                   |            |                                                  |                                                  |                                                                                               |      |                    |    |      |
|----|-------------------|------------|--------------------------------------------------|--------------------------------------------------|-----------------------------------------------------------------------------------------------|------|--------------------|----|------|
|    | Henderson_2016    | RNAseq     | fold change (fc) $\geq  0.2 $ and $p \leq 0.001$ | fold change (fc) $\geq  0.2 $ and $p \leq 0.001$ | Gene symbols                                                                                  | 40   | 34                 | 36 | 36   |
| SN | Bossers_2009      | microarray | bonf. P $\leq 0.05$                              | bonf. P $\leq 0.05$                              | Gene symbols                                                                                  | 262  | 222                | 5  | 251  |
|    | Cantuti_2007      | microarray | $p \leq 0.05$                                    | $p \leq 0.05$                                    | probe IDs (multiple probes can correspond to a single gene or single probe to multiple genes) | 129  | 138 (115 unique)   | 2  | 113  |
|    | Dijkstra_2015     | microarray | fold change (fc) $\geq  1.5 $                    | fold change (fc) $\geq  1.5 $ , but ordered by p | probe IDs (multiple probes can correspond to a single gene or single probe to multiple genes) | 1383 | 1459 (1153 unique) | 92 | 1061 |
|    | Durrenberger_2012 | microarray | fold change (fc) $\geq  1.5 $                    | fold change (fc) $\geq  1.5 $                    | Entrez IDs                                                                                    | 1423 | 1423 (1403 unique) | 0  | 1403 |
|    | Simunovic_2009    | microarray | FDR $\leq \sim 0.005$                            | FDR $\leq \sim 0.005$                            | probe IDs (multiple probes can correspond to a single gene or single probe to multiple genes) | 1044 | 1159 (993 unique)  | 44 | 949  |
